# Supplementary material for: Perceptual coupling and decoupling of the default mode network during mind-wandering and reading
Source: eLife. 2022 Mar 21;11:e74011. doi: 10.7554/eLife.74011 (PMC8937216; doi:10.7554/eLife.74011)
Supplement: Figure 2—source data 1. [file elife-74011-fig2-data1.xlsx]

## Sheet: Sheet1
Reading over Recall contrasted map									Recall over Reading contrasted map
Yeo 15: Medial temporal subsystem	Yeo 16: Core system	Yeo 17: Dorsal Medial subsystem	total voxel number within DMN subsystems						Yeo 15: Medial temporal subsystem	Yeo 16: Core system	Yeo 17: Dorsal Medial subsystem	total voxel number within DMN subsystems
0	9	1336	1345						884	6379	870	8133
0	0.669145	99.3309	100						10.8693	78.4335	10.6972	100
Medial temporal subsystem	0								Medial temporal subsystem	10.8693
Core system	0.669145								Core system	78.4335
Dorsal Medial subsystem	99.3309								Dorsal Medial subsystem	10.6972
